# Supplementary material for: Methods of breaking physical dormancy in seeds of the invasive weed Mimosa pudica (Fabaceae) and a comparison with 36 other species in the genus
Source: PeerJ. 2022 Jun 8;10:e13567. doi: 10.7717/peerj.13567 (PMC9188307; doi:10.7717/peerj.13567)
Supplement: Supplemental Information 1 — +, germination percentage significantly higher than that of control or if statistical test was not done ≥30% of the control; ++, treatment with the highest germination when multiple treatments were given for the same study; ++*, treatment with the highest germination percentage when multiple treatments were given in different studies; -, no significant increase in germination percentage or < 30% of control; yes, imbibition of scarified and non-scarified seeds compared; M, authors said that seeds had physical dormancy. Geographical distribution data are from the Royal Botanical Gardens, Kew, Plants of the World online, 6 August 2021. [file peerj-10-13567-s001.xlsx]

## Sheet: Sheet1
Table 2 Effect of dormancy-breaking treatments on, and geographical distribution/ecological status of, various taxa of Mimosa. +, germination percentage significantly higher than that of control or if statistical test was not done ≥30 % of the control; ++, treatment with the highest germination when multiple treatments were given for the same study; ++*, treatment with the highest germination per…
Species	Section	Treatment	Effect of dormancy- breaking treatment	Imbibition tested (yes)/just mentioned seeds have PY (M)	Native distribution and ecological status	References
M. aculeaticarpa	Batocaulon	mechanical scarification	+	M	Mexico, SE USA, endemic	Montaño-Arias et al. (2015)
M. adenantheroides	Batocaulon	mechanical scarification	+	M	Central and Southern Mexico, Honduras	Camargo-Ricalde et al. (2004)
M. bimucronata	Batocaulon	wet heat	++	M	Bolivia to Brazil and NE Argentina, invasive weed	Giasson et al. (2019)
		H2SO4 scarification	+
		wet heat	++*	M		Nogueira (1996)
		H2SO4 scarification	+
		wet heat	++	M		Geisler et al. (2017)
		dry heat	+
		cold stratification	-	Not M		Wang et al. (2016)
M. borealis	Batocaulon	mechanical scarification	+	M	W central and central USA to NE Mexico	Orozco-Almanza et al. (2003)
M. caesalpiniifolia	Batocaulon	cold stratification	-	M	Brazil	dos Santos et al. (2013)
		H2SO4 scarification	+
		wet heat	+
		mechanical scarification	++
		sodium hypochlorite	-
		wet heat	+	M		Leal et al. (2008)
		atmospheric pressure cold plasma	+	yes		da Silva et al. (2017)
M. calcicola	Batocaulon	mechanical scarification	+	M	Mexico	Camargo-Ricalde et al. (2004)
M. calodendron	Calothamnos	mechanical scarification	+	M	SE Brazil, endemic	Dayrell et al. (2015)
M. chaetocarpa	Mimosa	dry stored	++	M	Central Mexico	Moreno-Casasola et al. (1994)
		alternatively wet and dried	+
M. depauperata	Batocaulon	mechanical scarification	+	M	Mexico	Orozco-Almanza et al. (2003)
M. diplotricha	Batocaulon	H2SO4 scarification	+	M	Tropical and subtropical America, invasive weed	Nawa (2014)
		wet heat	+
		infrared radiation	-
		mechanical scarification	++
		burn (fire)	-	Not M		Aigbokhan et al. (2010)
M. dolens	Mimosa	wet heat	+	M	E Bolivia to Brazil and NE Argentina	Leal & Biondi (2007)
M. echinocaula	Batocaulon	dry heat	-	M	W central Brazil	Zirondi et al. (2019)
M. flocculosa	Calothamnos	H2SO4 scarification	+	M	W central and S Brazil to Paraguay	Ribeiro et al. (2020)
		wet heat	++
		H2SO4 scarification	+	M		Shibata et al. (2017)
M. foliolosa	Habbasia	H2SO4 scarification	+	M	Brazil	Silveira & Fernandes (2006)
		mechanical scarification	++
		dry heat	-	M		Zirondi et al. (2019)
		smoke	-
		dry heat and smoke	-
		mechanical scarification	+	M		Silva & Fernandes (2014)
		stored at room temperature	-
M. himalayana (M. rubicaulis)a	Batocaulon	Stored dry in tin boxes at room temperature for 1 year	+	M	Indian subcontinent	Rana et al. (2007)
		mechanical scarification (puncturing) of fresh seeds	-
		mechanical scarification (puncturing) after 1 year of dry storage	+
		mechanical scarification of fresh seeds (rubbing with sand paper)	+
		mechanical scarification (rubbing with sand paper) after 1 year of dry storage	++*
		H2SO4 scarification of fresh seeds	+
		H2SO4 scarification after 1 year of dry storage	++*
		wet heat of fresh seeds	-
		wet heat after 1 year of dry storage	+
M. invisa	Batocaulon	H2SO4 scarification	++	M	Colombia to Venezuela and Paraguay, invasive weed	Chauhan & Johnson (2008)
		dry heat	+
M. lacerata	Batocaulon	mechanical scarification	+	M	Mexico	Camargo-Ricalde et al. (2004)
				M		Orozco-Almanza et al. (2003)
M. laticifera	Batocaulon	dry heat	-	Not M	C and E Brazil	Rizzini (1976)
		mechanical scarification	+
M. leiocephala	Habbasia	dry heat	+	M	C Brazil	Zirondi et al. (2019)
		smoke	-
		dry heat and smoke	++
M. luisana	Batocaulon	mechanical scarification	+	M	Mexico	Montaño-Arias et al. (2015)
		mechanical scarification	++	M		Montaño-Arias et al. (2021)
		ingested by goat	+	M		Giordani (2008)
M. monancistra	Batocaulon	wet heat	-	M	Mexico	González-Castañeda et al. (2004)
		H2SO4 scarification	++
		mechanical scarification	+
M. multipinna	Habbasia	mechanical scarification	+	Not M	Brazil	Rizzini (1976)
M. ophthalmocentra	Batocaulon	H2SO4 scarification	+	M	Cand E Brazil	Brito et al. (2014)
		20% caustic soda	-
		commercial bleach	-
M. pudica	Mimosa	dry heat	+	M	Native to tropical America, cultivated around the world, invasive weed	Chauhan & Johnson (2009)
		wet heat	+
		H2SO4 scarification	+
		mechanical scarification	++
		cold stratification	-	Not-M		Wang et al. (2016)
		mechanical scarification	+	yes		Jayasuriya et al. (2013)
		mechanical scarification	++*	M		Niroula (2009)
		H2SO4 scarification
		7-year-old seeds	-
M. pigra	Habbasia	mechanical scarification	++	M	Tropical and subtropical America, invasive weed	Marambe et al. (2004)
		H2SO4 scarification	+	Not M		Dillon & Forcella (1985)
		mechanical scarification	+	yes		Jayasuriya et al. (2013)
M. pilulifera	Calothamnos	H2SO4 scarification	+	M	SE and S Brazil to NE Argentina	Fowler & Carpanezz (1999)
		wet heat	++
M. polyantha	Batocaulon	mechanical scarification	+	M	Mexico, Colombia	Camargo-Ricalde et al. (2004)
M. pteridifolia	Batocaulon	dry heat	-	M	Brazil	Zirondi et al. (2019)
		smoke	-
		dry heat and smoke	+
M. regnellii	Mimosa	H2SO4 scarification	+	Not M	SE and S Brazil to NE Argentina, rare	Fowler & Carpanezzi (1997)
		wet heat	++
M. scabrella	Calothamnos	wet heat	+	M	SE to S Brazil to NE Argentina, invasive weed	Bianchetti (1981)
		H2SO4 scarification	++
		wet heat	+	M		da Rosa et al. (2012)
		mechanical scarification	++*
M. setosa	Habbasia	H2SO4 scarification	+	M	Brazil to Paraguay	Sperandio et al. (2013)
		wet heat	++
		KNO3	-
M. similis	Batocaulon	mechanical scarification	+	M	SW. Mexico	Orozco-Almanza et al. (2003)
M. skinneri var. carajarum	Mimosa	mechanical scarification	+	M	N Brazil	Zanetti et al. (2020)
M. somnian	Habbasia	dry heat	-	M	Mexico to S tropical America to Trinidad, weed	Zirondi et al. (2019)
		smoke	+
		dry heat and smoke	+
		freezing (liquid nitrogen)	++	M		Salomão (2002)
M. strigillosa	Habbasia	cold stratification	-	Not M	S USA to Mexico, W central Brazil to N Argentina	Walker (2006)
		wet heat	-
		mechanical scarification	+
		H2O2	-
		wet heat/ cold stratification	-
M. strobiliflora	Batocaulon	wet heat	+	M	Brazil, threatened species	Biondi & Leal (2008)
M. tenuiflora	Habbasia	wet heat	+	Not M	S Mexico to Venezuela, NE Brazil	Araujo & Andrade (1983)
		H2SO4 scarification	+
		mechanical scarification	++
		dry heat	-
		mechanical scarification	++	M		Camargo-Ricalde & Grether (1998)
		H2SO4 scarification	+
		heat from fire	-
a Fresh and 1-year-old (dry stored) seeds of M. himalayana rubbed with sand paper germinated to 98 and 100%, respectively, suggesting that seeds have only PY. However, the lower germination of fresh punctured, wet heat- and acid-treated seeds compared to 1-year-old seeds (Rana et al., 2007) suggests that seeds have PY+PD.
