# Supplementary material for: Methods of breaking physical dormancy in seeds of the invasive weed Mimosa pudica (Fabaceae) and a comparison with 36 other species in the genus
Source: PeerJ. 2022 Jun 8;10:e13567. doi: 10.7717/peerj.13567 (PMC9188307; doi:10.7717/peerj.13567)
Supplement: Supplemental Information 2 [file peerj-10-13567-s002.xlsx]

## Sheet: Sheet1
Mass Time	Replication	0h	1h	2h	3h	4h	5h	6h	8h	12h	25h
Scarified	A	0.1102	0.1182	0.1296	0.1417	0.1606	0.1658	0.1765	0.1959	0.2137	0.2488
	B	0.1222	0.133	0.1424	0.1557	0.1864	0.1951	0.2076	0.2373	0.2552	0.2865
	C	0.1275	0.1383	0.1506	0.1725	0.2002	0.2101	0.2223	0.246	0.2696	0.2897
	D	0.1172	0.1298	0.1397	0.1641	0.2086	0.2231	0.2239	0.2573	0.2634	0.2718
Intact	A	0.1161	0.1187	0.1217	0.1207	0.1231	0.1226	0.1222	0.1237	0.1241	0.1263
	B	0.1265	0.1269	0.127	0.126	0.1276	0.127	0.1278	0.1273	0.1299	0.1347
	C	0.1272	0.1294	0.1312	0.1306	0.1341	0.1337	0.1344	0.1349	0.1355	0.1369
	D	0.1222	0.125	0.1275	0.1268	0.1292	0.127	0.1322	0.1338	0.1365	0.147
