# Supplementary material for: Methods of breaking physical dormancy in seeds of the invasive weed Mimosa pudica (Fabaceae) and a comparison with 36 other species in the genus
Source: PeerJ. 2022 Jun 8;10:e13567. doi: 10.7717/peerj.13567 (PMC9188307; doi:10.7717/peerj.13567)
Supplement: Supplemental Information 3 [file peerj-10-13567-s003.xlsx]

## Sheet: Sheet1
Scarified seed
Temperature Time (h)	Replication	24	48	72	96	120	144	168	192	216	240	264	288	312	336
10/20℃	A	0	0	0	1	9	12	14	20	22	22	22	22	22	22
	B	0	0	0	2	11	15	15	20	22	22	22	22	22	22
	C	0	0	0	1	11	18	19	22	24	24	24	24	24	24
	D	0	0	0	1	7	15	16	19	22	22	22	22	22	22
15/25℃	A	6	17	20	21	22	22	22	22	22	22	22	22	22	22
	B	2	13	19	20	21	21	21	21	21	21	21	21	21	21
	C	4	10	21	22	22	22	22	22	22	22	22	22	22	22
	D	4	16	23	23	23	24	24	24	24	24	24	24	24	24
20/30℃	A	5	20	23	23	23	23	23	23	23	23	23	23	23	23
	B	3	21	22	22	22	22	22	22	22	22	22	22	22	22
	C	0	19	19	20	20	20	20	20	20	20	20	20	20	20
	D	0	18	25	25	25	25	25	25	25	25	25	25	25	25
25/35℃	A	0	12	21	22	25	25	25	25	25	25	25	25	25	25
	B	0	6	12	12	23	24	24	24	24	24	24	24	24	24
	C	0	8	14	17	23	23	23	23	23	23	23	23	23	23
	D	0	5	13	15	19	20	20	20	20	20	20	20	20	20
30/40℃	A	11	17	19	19	21	23	24	25	25	25	25	25	25	25
	B	6	13	12	17	18	19	19	23	23	23	23	23	23	23
	C	3	10	18	13	17	18	19	20	20	20	20	20	20	20
	D	5	16	14	14	15	17	20	21	21	21	21	21	21	21
40℃	A	6	20	21	21	21	21	21	21	21	21	21	21	21	21
	B	10	21	21	21	21	21	21	21	21	21	21	21	21	21
	C	8	22	23	23	23	23	23	23	23	23	23	23	23	23
	D	10	20	22	23	23	23	23	23	23	23	23	23	23	23
Intact seed
10/20℃	A	0	0	0	0	0	0	0	0	0	0	0	0	0	0
	B	0	0	0	0	0	0	0	1	1	1	1	1	1	1
	C	0	0	0	0	0	0	0	0	0	0	0	0	0	0
	D	0	0	0	0	0	0	0	0	0	0	0	0	0	0
15/25℃	A	0	0	0	0	0	0	0	0	0	0	0	0	0	0
	B	0	0	0	0	0	0	0	0	0	0	0	0	0	0
	C	0	0	0	0	0	0	0	0	0	0	0	0	0	0
	D	0	0	0	0	0	0	0	0	0	0	0	0	0	0
20/30℃	A	0	0	0	0	1	1	1	1	1	2	2	2	2	2
	B	0	0	0	0	0	0	0	0	0	0	0	0	0	0
	C	0	0	0	0	0	0	0	0	0	0	0	0	0	0
	D	0	0	0	0	1	1	1	1	1	1	1	1	1	1
25/35℃	A	0	0	0	0	0	0	0	0	0	1	1	1	1	1
	B	0	0	0	0	0	1	1	1	1	1	1	1	1	1
	C	0	0	0	0	0	0	1	1	1	1	1	1	1	1
	D	0	0	0	0	0	1	1	2	2	2	2	2	2	2
30/40℃	A	0	0	0	0	0	1	1	3	6	8	8	8	8	8
	B	0	0	0	1	2	5	7	8	9	12	12	12	12	12
	C	0	0	0	1	1	1	2	2	2	2	2	2	2	2
	D	0	0	0	0	2	2	2	3	3	5	5	5	5	5
40℃	A	0	4	11	12	12	12	12	12	12	12	12	12	12	12
	B	0	6	8	9	10	10	10	10	10	10	10	10	10	10
	C	0	9	9	13	16	16	16	16	16	16	16	16	16	16
	D	0	6	10	11	11	14	14	14	14	14	14	14	14	14
