# Supplementary material for: Methods of breaking physical dormancy in seeds of the invasive weed Mimosa pudica (Fabaceae) and a comparison with 36 other species in the genus
Source: PeerJ. 2022 Jun 8;10:e13567. doi: 10.7717/peerj.13567 (PMC9188307; doi:10.7717/peerj.13567)
Supplement: Supplemental Information 4 [file peerj-10-13567-s004.xlsx]

## Sheet: Sheet1
Cycle times Time(h)	Replication	24	30	40	52	62	75	87	135	171	195	220	232	240	264	288	312	336	Germination	Nonviable
1	A	0	0	0	1	1	6	6	10	10	18	19	21	21	21	21	21	21	21	0
	B	0	1	1	1	4	3	4	13	13	18	19	21	21	21	21	21	21	21	0
	C	0	1	1	1	2	2	2	10	10	17	22	24	24	24	24	24	24	24	0
	D	0	0	0	0	0	1	2	11	11	13	22	22	22	22	22	22	22	22	0
5	A	0	1	3	5	14	22	22	23	23	23	23	23	23	23	23	23	23	23	0
	B	0	1	3	4	9	16	17	18	18	18	18	18	18	18	18	18	18	18	3
	C	0	0	4	6	15	19	20	20	20	20	20	20	20	20	20	20	20	20	5
	D	0	1	1	4	12	19	19	19	19	19	19	19	19	19	19	19	19	19	3
10	A	0	0	2	6	13	19	21	22	22	22	22	22	22	22	22	22	22	22	3
	B	0	1	1	2	10	15	16	19	19	19	19	19	19	19	19	19	19	19	5
	C	0	1	1	4	14	19	20	20	20	20	20	20	20	20	20	20	20	20	5
	D	0	0	1	4	10	19	20	23	23	23	23	23	23	23	23	23	23	23	1
30	A	0	0	1	1	6	12	15	16	17	17	17	17	17	17	17	17	17	17	8
	B	0	0	0	1	5	9	12	18	18	18	18	18	18	18	18	18	18	18	6
	C	0	0	0	1	5	8	8	12	13	13	13	13	13	13	13	13	13	13	9
	D	0	0	0	1	3	9	9	13	13	13	13	13	13	13	13	13	13	13	12
