# Supplementary material for: Methods of breaking physical dormancy in seeds of the invasive weed Mimosa pudica (Fabaceae) and a comparison with 36 other species in the genus
Source: PeerJ. 2022 Jun 8;10:e13567. doi: 10.7717/peerj.13567 (PMC9188307; doi:10.7717/peerj.13567)
Supplement: Supplemental Information 5 [file peerj-10-13567-s005.xlsx]

## Sheet: Sheet1
Treatment Time (h)	Replication	24	36	48	72	96	120	144	168	192	216	240	264	288	312	336
CK	A	0	13	18	20	21	21	21	21	21	21	21	21	21	21	21
	B	0	14	18	20	22	22	22	22	22	22	22	22	22	22	22
	C	0	11	17	21	22	22	22	22	22	22	22	22	22	22	22
All	A	0	0	0	0	0	0	0	0	1	1	1	1	1	1	1
	B	0	0	0	0	0	0	0	0	0	0	0	0	0	0	0
	C	0	0	0	0	0	0	0	1	1	1	1	1	1	1	1
Pleurogram	A	0	0	4	10	11	14	14	14	15	15	15	15	15	15	15
	B	0	0	2	11	11	13	16	16	17	17	17	17	17	17	17
	C	0	0	2	2	2	6	11	13	15	15	15	15	15	15	15
Hilar region	A	0	0	0	0	0	0	0	0	1	1	1	1	1	1	1
	B	0	0	0	0	0	0	0	0	1	1	1	1	1	1	1
	C	0	0	0	0	0	0	0	1	1	1	1	1	1	1	1
