# Supplementary material for: Methods of breaking physical dormancy in seeds of the invasive weed Mimosa pudica (Fabaceae) and a comparison with 36 other species in the genus
Source: PeerJ. 2022 Jun 8;10:e13567. doi: 10.7717/peerj.13567 (PMC9188307; doi:10.7717/peerj.13567)
Supplement: Supplemental Information 6 — Different lowercase letters indicate significant differences among different temperatures and times under the same treatment (P < 0.05). CK is intact seed with no dormancy breaking treatment, i.e., control. [file peerj-10-13567-s006.xlsx]

## Sheet: Sheet1
Treatment Time (h)	Replication	24	48	72	96	120	144	168	192	216	240	264	288	312	336	Number of germinate	Number of Nonviable	Germination (%)	Viable (%) = 100 - Nonviable (%)	Viable nongerminated (%) =Viable (%) - Germination (%)	Nonviable (%)
wet heat-65℃，1min	A	0	0	1	2	4	4	6	6	6	6	6	6	6	6	6	1	24	96	72	4
	B	0	0	0	1	2	6	10	11	13	13	13	13	13	13	13	1	52	96	44	4
	C	0	0	0	0	1	2	4	5	9	9	9	9	9	9	9	2	36	92	56	8
	D	0	0	0	0	0	2	5	7	7	7	7	7	7	7	7	4	28	84	56	16
wet heat-65℃，10min	A	0	0	0	1	3	5	6	6	12	13	13	13	13	13	13	1	52	96	44	4
	B	0	0	1	2	6	7	9	9	10	11	11	11	11	11	11	2	44	92	48	8
	C	0	0	0	1	1	2	5	8	10	12	12	12	12	12	12	0	48	100	52	0
	D	0	0	0	1	3	4	6	6	9	9	10	10	10	10	10	2	40	92	52	8
wet heat-65℃，30min	A	0	0	0	2	3	6	10	13	15	15	15	15	15	15	15	1	60	96	36	4
	B	0	0	0	0	3	7	10	11	11	11	11	11	11	11	11	5	44	80	36	20
	C	0	0	0	0	0	5	5	7	8	8	9	9	9	9	9	1	36	96	60	4
	D	0	0	0	1	1	6	8	10	14	14	15	15	15	15	15	2	60	92	32	8
wet heat-80℃，1min	A	0	0	0	6	8	13	16	17	19	21	21	21	21	21	21	2	84	92	8	8
	B	0	0	0	1	2	8	19	18	18	18	18	18	18	18	18	4	72	84	12	16
	C	0	0	0	0	1	8	16	16	16	16	16	16	16	16	16	3	64	88	24	12
	D	0	0	0	2	2	6	13	13	14	14	14	14	14	14	14	3	56	88	32	12
wet heat-80℃，10min	A	0	0	0	5	7	14	19	21	23	23	23	23	23	23	23	0	92	100	8	0
	B	0	0	0	2	3	7	12	14	17	17	18	18	18	18	18	5	72	80	8	20
	C	0	0	0	3	6	15	17	18	20	21	22	22	22	22	22	2	88	92	4	8
	D	0	0	0	3	7	11	19	21	21	22	23	23	23	23	23	2	92	92	0	8
wet heat-80℃，30min	A	0	0	0	1	4	4	10	13	15	15	16	16	16	16	16	6	64	76	12	24
	B	0	0	0	1	2	3	6	8	8	9	9	9	9	9	9	15	36	40	4	60
	C	0	0	0	0	1	5	8	9	9	9	9	9	9	9	9	15	36	40	4	60
	D	0	0	0	0	0	1	4	4	4	5	5	5	5	5	5	20	20	20	0	80
wet heat-95℃，1min	A	0	0	0	1	5	11	17	18	18	18	18	18	18	18	18	7	72	72	0	28
	B	0	0	0	2	4	9	20	20	21	21	21	21	21	21	21	4	84	84	0	16
	C	0	0	0	3	4	10	17	19	19	19	20	20	20	20	20	2	80	92	12	8
	D	0	0	0	3	8	14	20	20	20	20	20	20	20	20	20	2	80	92	12	8
wet heat-95℃，10min	A	0	0	0	4	5	8	11	11	11	11	11	11	11	11	11	14	44	44	0	56
	B	0	0	0	1	1	6	16	16	19	20	20	20	20	20	20	5	80	80	0	20
	C	0	0	0	0	3	11	15	16	17	17	17	17	17	17	17	6	68	76	8	24
	D	0	0	0	1	2	10	13	13	14	14	15	15	15	15	15	10	60	60	0	40
wet heat-95℃，30min	A	0	0	0	1	1	6	9	10	10	10	10	10	10	10	10	14	40	44	4	56
	B	0	0	0	0	1	2	5	7	8	9	9	9	9	9	9	12	36	52	16	48
	C	0	0	0	0	0	9	14	15	16	16	16	16	16	16	16	9	64	64	0	36
	D	0	0	0	0	0	6	9	10	11	11	12	12	12	12	12	11	48	56	8	44
dry heat-65℃，1min	A	0	0	0	0	0	0	0	0	1	1	1	1	1	1	1	0	4	100	96	0
	B	0	0	0	0	0	0	0	0	0	0	1	1	1	1	1	0	4	100	96	0
	C	0	0	0	0	0	0	0	0	0	0	0	0	0	0	0	0	0	100	100	0
	D	0	0	0	0	0	0	0	0	0	0	0	0	0	0	0	0	0	100	100	0
dry heat-65℃，10min	A	0	0	0	0	0	0	2	2	3	3	4	4	4	4	4	2	16	92	76	8
	B	0	0	0	1	1	1	2	2	2	2	2	2	2	2	2	1	8	96	88	4
	C	0	0	0	0	0	0	1	1	1	1	1	1	1	1	1	0	4	100	96	0
	D	0	0	0	0	0	1	1	1	1	1	1	1	1	1	1	0	4	100	96	0
dry heat-65℃，30min	A	0	0	0	0	0	0	0	0	0	0	0	0	0	0	0	0	0	100	100	0
	B	0	0	0	1	1	2	2	2	2	2	2	2	2	2	2	0	8	100	92	0
	C	0	0	0	0	0	1	1	1	1	1	1	1	1	1	1	0	4	100	96	0
	D	0	0	0	0	0	1	2	2	2	2	3	3	3	3	3	0	12	100	88	0
dry heat-80℃，1min	A	0	0	0	0	0	0	0	0	0	0	0	0	0	0	0	1	0	96	96	4
	B	0	0	0	0	0	0	0	0	0	0	0	0	0	0	0	0	0	100	100	0
	C	0	0	0	0	0	0	0	0	0	0	0	0	0	0	0	0	0	100	100	0
	D	0	0	0	0	0	0	0	0	0	0	0	0	0	0	0	0	0	100	100	0
dry heat-80℃，10min	A	0	0	0	0	0	0	2	5	9	9	9	9	9	9	9	1	36	96	60	4
	B	0	0	0	0	0	0	1	1	1	1	2	2	2	2	2	0	8	100	92	0
	C	0	0	0	0	0	2	4	4	4	5	6	6	6	6	6	0	24	100	76	0
	D	0	0	0	0	0	0	2	2	2	4	5	5	5	5	5	0	20	100	80	0
dry heat-80℃，30min	A	0	0	0	1	1	2	3	5	6	6	6	6	6	6	6	1	24	96	72	4
	B	0	0	0	0	0	1	4	4	5	7	7	7	7	7	7	0	28	100	72	0
	C	0	0	0	0	0	0	1	1	1	3	5	5	5	5	5	0	20	100	80	0
	D	0	0	0	0	0	1	3	3	4	6	7	7	7	7	7	0	28	100	72	0
dry heat-95℃，1min	A	0	0	0	0	0	0	0	0	0	0	0	0	0	0	0	0	0	100	100	0
	B	0	0	0	0	0	0	0	0	0	0	0	0	0	0	0	1	0	96	96	4
	C	0	0	0	0	0	0	0	0	0	0	0	0	0	0	0	1	0	96	96	4
	D	0	0	0	0	0	1	1	1	1	1	1	1	1	1	1	1	4	96	92	4
dry heat-95℃，10min	A	0	0	0	0	0	3	6	10	17	17	17	17	17	17	17	0	68	100	32	0
	B	0	0	0	0	1	8	11	11	12	12	14	14	14	14	14	1	56	96	40	4
	C	0	0	0	0	0	0	4	6	7	7	8	8	8	8	8	2	32	92	60	8
	D	0	0	0	0	0	1	8	8	9	10	11	11	11	11	11	2	44	92	48	8
dry heat-95℃，30min	A	0	0	0	0	0	0	0	2	4	7	15	15	15	15	15	0	60	100	40	0
	B	0	0	0	1	0	2	5	6	8	8	9	9	9	9	9	1	36	96	60	4
	C	0	0	0	0	1	3	6	6	7	8	8	8	8	8	8	3	32	88	56	12
	D	0	0	0	0	0	5	7	7	8	10	12	12	12	12	12	4	48	84	36	16
